# Supplementary material for: Plant uptake of phosphorus and nitrogen recycled from synthetic source-separated urine
Source: Ambio. 2015 Feb 15;44(Suppl 2):217–27. doi: 10.1007/s13280-014-0616-6 (PMC4329146; doi:10.1007/s13280-014-0616-6)
Supplement: Supplementary file 1 — Supplementary material 1 (PDF 356 kb) [file 13280_2014_616_MOESM1_ESM.pdf]

***AMBIO***

Electronic Supplementary Material

*This supplementary material has not been peer reviewed.*

**Plant uptake of phosphorus and nitrogen recycled from synthetic source-separated urine**

Christophe Bonvin, Bastian Etter, Kai M. Udert, Emmanuel Frossard, Simone Nanzer,  
Federica Tamburini, Astrid Oberson

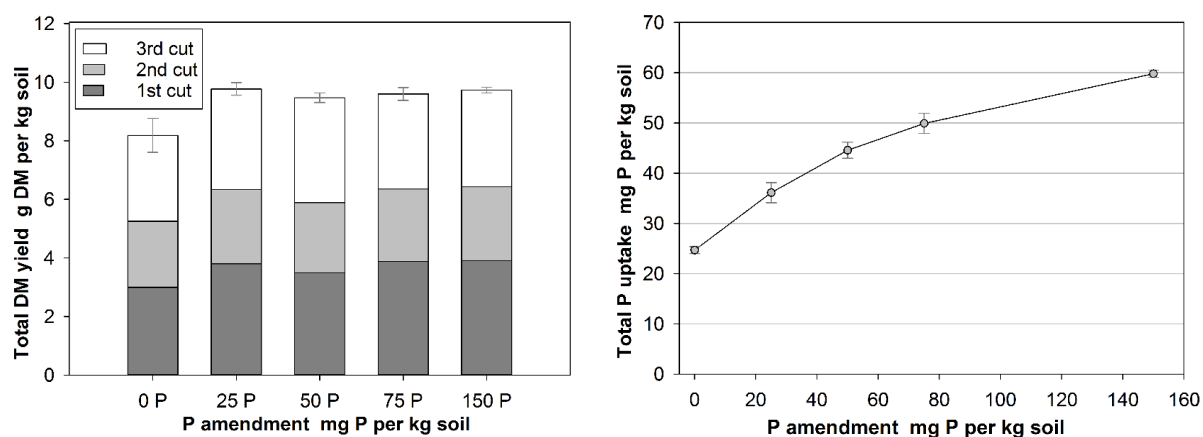

**Fig. S1** (Left) Total DM production of Italian ryegrass shoots in treatments with different levels of P fertilisation (P response curve). All treatments received 100 mg N kg<sup>-1</sup> soil at the start of the experiment and after each cut. (Right) Total P uptake by Italian ryegrass shoots in the same treatments. Vertical bars indicate standard deviations.

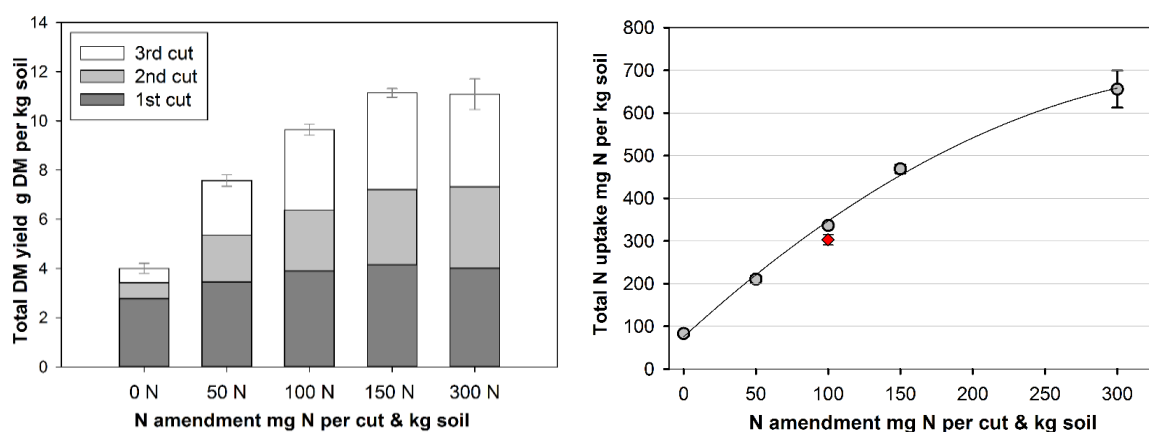

**Fig. S2** (Left) Total dry matter (DM) production of Italian ryegrass shoots in treatments with different levels of N fertilisation (N response curve). All treatments apart from 100N (75 mg P) received 50 mg P kg<sup>-1</sup> soil at the start of the experiment. (Right) Total N uptake of Italian ryegrass shoots of these same treatments. Treatment 1N1P (red diamond) is below the N uptake response curve, confirming the suspicion that it received an erroneous N dose at sowing. Vertical bars indicate standard deviations

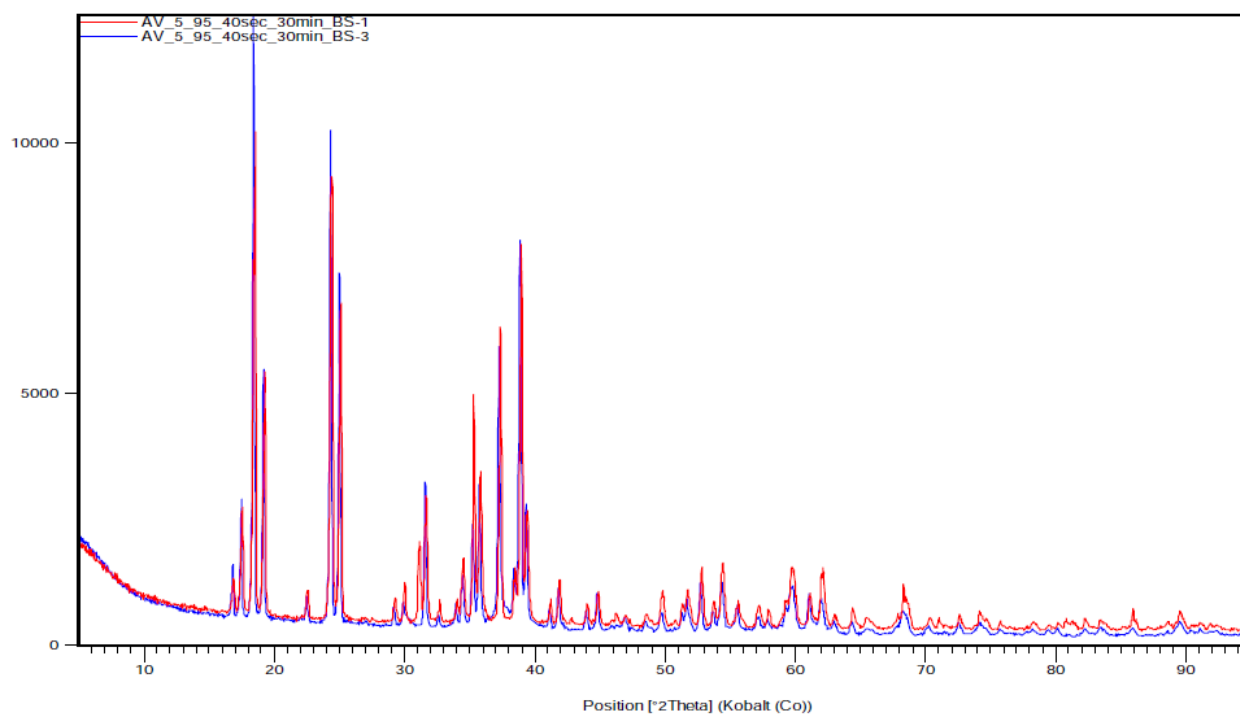

**Fig. S3** Qualitative comparison of synthetic struvite used in this experiment (red curve) and struvite processed from real human urine taken from the men's tank at a research institution (blue curve). Matching peak height, width and area suggest that the elemental composition and crystal structure of the two struvites are similar

**Table S1** Dry matter (DM) content, total P and N concentration and solubility in water of fertilisers processed from real human urine taken from the urinal tank at a research institution. NUF = nitrified urine fertiliser

| Fertiliser                | DM<br>content | Total<br>N | Total<br>P         | Solubility of<br>elements in H <sub>2</sub> O |         |
|---------------------------|---------------|------------|--------------------|-----------------------------------------------|---------|
|                           |               |            |                    | *<br>% of      % of                           |         |
|                           | %             |            | mg g <sup>-1</sup> | total N                                       | total P |
| Real human urine struvite | 88            | 51         | 120                | 2.1                                           | 2       |
| Real human urine NUF      | 94            | 191        | 20                 | 93                                            | 57      |

\* Water-soluble phosphate, ammonia and nitrate ions determined in product suspensions (2.5 g fertiliser per 250 mL water). Method from European Parliament (2003).
